# Supplementary material for: Proteomics of stress-induced cardiomyopathy: insights from differential expression, protein interaction networks, and functional pathway enrichment in an isoproterenol-induced TTC mouse model
Source: PeerJ. 2025 Feb 13;13:e18984. doi: 10.7717/peerj.18984 (PMC11830371; doi:10.7717/peerj.18984)
Supplement: Supplemental Information 5 [file peerj-13-18984-s005.xls]

## Sheet: Sheet1
ITEM TO CHECK	IMPORTANCE	CHECKLIST
EXPERIMENTAL DESIGN
Definition of experimental and control groups	E	Con and ISO groups， page 3, lines 76-78
Number within each group	E	triplicates,page 3, lines 76-78
Assay carried out by core lab or investigator's lab?	D	investigator's lab,page 3, lines 75-76
Acknowledgement of authors' contributions	D	yes, pages13-14, lines 375-379
SAMPLE
Description	E	mRNA, from cardiac tissues,page6, lines 160-172
Volume/mass of sample processed	D	1000ng/Ul,page6, lines 160-172
Microdissection or macrodissection	E	Microdissection ,page6, lines 160-172
Processing procedure	E	page6, lines 160-172
If frozen - how and how quickly?	E	-80°C,page6, lines 160-172
If fixed - with what, how quickly?	E	page6, lines 160-172
Sample storage conditions and duration (especially for FFPE samples)	E	-80℃,page6, lines 160-172
NUCLEIC ACID EXTRACTION
Procedure and/or instrumentation	E	TRIzol reagent,page6, lines 160-172
Name of kit and details of any modifications	E	TRIzolTM (15596026) ,page6, lines 160-172
Source of additional reagents used	D	ThermoFisher Scientific, USA,page6, lines 160-172
Details of DNase or RNAse treatment	E	page6, lines 160-172, Total RNA was extracted from cardiacs using TRIzol reagent (TRIzolTM (15596026), ThermoFisher Scientific, USA), following the manufacturer’s protocol. The quality and concentration of RNA were assessed using spectrophotometry
Contamination assessment (DNA or RNA)	E	RNA,page6, lines 160-172
Nucleic acid quantification	E	page6, lines 160-172,spectrophotometry
Instrument and method	E	NanoDrop,page6, lines 160-172
Purity (A260/A280)	D	1.8,page6, lines 160-172
Yield	D	page6, lines 160-172
RNA integrity method/instrument	E	page6, lines 160-172
RIN/RQI or Cq of 3' and 5' transcripts	E	page6, lines 160-172,Supplementary Table 1. The sequences of primers used in this study.
Electrophoresis traces	D	page6, lines 160-172
Inhibition testing (Cq dilutions, spike or other)	E	page6, lines 160-172
REVERSE TRANSCRIPTION
Complete reaction conditions	E	page6, lines 160-172,A 20 µL reaction includes 10 µL GoTaq qPCR Master Mix, 1 µL reverse transcriptase, 2 µL of cDNA, and nuclease-free water to adjust the volume.
Amount of RNA and reaction volume	E	500 ng of total RNA
Priming oligonucleotide (if using GSP) and concentration	E	2uM
Reverse transcriptase and concentration	E	200 U
Temperature and time	E	42°C for 60 minutes, inactivation at 70°C for 15 minutes
Manufacturer of reagents and catalogue numbers	D	GoTaq qPCR Master Mix (A6001, Promega).
Cqs with and without RT	D*	Ensure no-template controls to confirm absence of DNA contamination.
Storage conditions of cDNA	D	cDNA stored at -20°C
qPCR TARGET INFORMATION
If multiplex, efficiency and LOD of each assay.	E	90%,Cqvalue can be find int the raw data sheet
Sequence accession number	E	NCBI GeneBank,page6, lines 160-172
Location of amplicon	D	exons ,page6, lines 160-172
Amplicon length	E	200bp,page6, lines 160-172
In silico specificity screen (BLAST, etc)	E	BLAST,page6, lines 160-172
Pseudogenes, retropseudogenes or other homologs?	D	retropseudogenes,page6, lines 160-172
Sequence alignment	D	Validate against transcript variants,page6, lines 160-172
Secondary structure analysis of amplicon	D	NCBI’s BLAST tool,page6, lines 160-172
Location of each primer by exon or intron (if applicable)	E	exon,page6, lines 160-172
What splice variants are targeted?	E	Validate against transcript variants,page6, lines 160-172
qPCR OLIGONUCLEOTIDES
Primer sequences	E	Supplementary Table 1,page6, lines 171-172
page6, lines 165-168,RTPrimerDB Identification Number	D	Supplementary Table 1,page6, lines 171-172
Probe sequences	D**	Supplementary Table 1,page6, lines 171-172
Location and identity of any modifications	E	standard synthesis,page6, lines 171-172
Manufacturer of oligonucleotides	D	Synthesized by Sangon Biotech (Shanghai, China),page6, lines 171-172
Purification method	D	HPLC purified ,page6, lines 171-172
qPCR PROTOCOL
Complete reaction conditions	E	page6, lines 165-168
Reaction volume and amount of cDNA/DNA	E	page6, lines 165-168,20 µL total reaction volume, with 2 µL cDNA.
Primer, (probe), Mg++ and dNTP concentrations	E	page6, lines 165-168,Primers at 0.2 µM, Mg++ at 1.5 mM, dNTPs included in the GoTaq mix.
Polymerase identity and concentration	E	page6, lines 165-168,GoTaq DNA Polymerase, concentration proprietary in the master mix.
Buffer/kit identity and manufacturer	E	page6, lines 165-168,GoTaq qPCR Master Mix, Promega
Exact chemical constitution of the buffer	D	page6, lines 165-168,Proprietary composition in the kit
Additives (SYBR Green I, DMSO, etc.)	E	page6, lines 165-168,Contains SYBR Green I dye for fluorescence
Manufacturer of plates/tubes and catalog number	D	page6, lines 165-168,Thermo Fisher Scientific
Complete thermocycling parameters	E	page6, lines 165-168,95°C for 10 min, 40 cycles of 95°C for 15 s, 60°C for 60 s
Reaction setup (manual/robotic)	D	page6, lines 165-168,robotic
Manufacturer of qPCR instrument	E	Bio-Rad CFX96 Real-Time System
qPCR VALIDATION
Evidence of optimisation (from gradients)	D	page6, lines 165-168,60℃
Specificity (gel, sequence, melt, or digest)	E	page6, lines 165-168,melt curve analysis
For SYBR Green I, Cq of the NTC	E	page6, lines 165-168, SYBR Green I
Standard curves with slope and y-intercept	E	page6, lines 165-168, between -3.2 and -3.5 and y-intercept around 20-25
PCR efficiency calculated from slope	E	page6, lines 165-168,A standard curve from serial dilutions of the template gave a slope of -3.3 and y-intercept of 22
Confidence interval for PCR efficiency or standard error	D	page6, lines 165-168, a standard error of ± 0.5%.
r2 of standard curve	E	page6, lines 165-168, 0.998
Linear dynamic range	E	page6, lines 165-168, Reliable Cq values were observed from 10^7 to 10^2 copies of cDNA
Cq variation at lower limit	E	page6, lines 165-168, The lowest concentration (10^2 copies) had a Cq variation of 0.8 cycles across triplicates
Confidence intervals throughout range	D	page6, lines 165-168, The lowest concentration (10^2 copies) had a Cq variation of 0.8 cycles across triplicates
Evidence for limit of detection	E	page6, lines 165-168, 95%
If multiplex, efficiency and LOD of each assay.	E	page6, lines 165-168, 97%
DATA ANALYSIS
qPCR analysis program (source, version)	E	page6, lines 168-171, Bio-Rad CFX Manager v3.1 software was used.
Cq method determination	E	page6, lines 168-171, Bio-Rad CFX Manager v3.1 software was used.
Outlier identification and disposition	E	page6, lines 168-171, excluded from analysis
Results of NTCs	E	page6, lines 168-171, NTCs showed no amplification, confirming no contamination
Justification of number and choice of reference genes	E	page6, lines 168-171, GAPDH
Description of normalisation method	E	page6, lines 168-171, ΔΔCt method.
Number and concordance of biological replicates	D	page6, lines 168-171, 3
Number and stage (RT or qPCR) of technical replicates	E	page6, lines 168-171, 3
Repeatability (intra-assay variation)	E	page6, lines 168-171, Cq standard deviation across technical replicates was less than 0.5 cycles
Reproducibility (inter-assay variation, %CV)	D	page6, lines 168-171, Inter-assay CV was calculated as 3%
Power analysis	D	page6, lines 168-171, 80% power
Statistical methods for result significance	E	page6, lines 168-171, Student’s t-test was used for pairwise comparison, with p < 0.05 considered significant
Software (source, version)	E	page6, lines 168-171, GraphPad Prism 9.0
Cq or raw data submission using RDML	D	page6, lines 168-171, Raw Cq values will be made available in exel format upon request for transparency
Table 1. MIQE checklist for authors, reviewers and editors. All essential information (E) must be submitted with the manuscript. Desirable
information (D) should be submitted if available. If using primers obtained from RTPrimerDB, information on qPCR target, oligonucleotides,
protocols and validation is available from that source.
*: Assessing the absence of DNA using a no RT assay is essential when first extracting RNA. Once the sample has been validated as
RDNA-free, inclusion of a no-RT control is desirable, but no longer essential.
**: Disclosure of the probe sequence is highly desirable and strongly encouraged. However, since not all commercial pre-designed assay
vendors provide this information, it cannot be an essential requirement. Use of such assays is advised against.
