# Supplementary material for: Proteomics of stress-induced cardiomyopathy: insights from differential expression, protein interaction networks, and functional pathway enrichment in an isoproterenol-induced TTC mouse model
Source: PeerJ. 2025 Feb 13;13:e18984. doi: 10.7717/peerj.18984 (PMC11830371; doi:10.7717/peerj.18984)
Supplement: Supplemental Information 6 [file peerj-13-18984-s006.xlsx]

## Sheet: Heart Rate
Con	ISO 1d	ISO 3d	ISO 7d
304	450	350	353
376	460	324	334
314	470	360	340
322	430	318	358
340	443	325	345

## Sheet: Respiration Rate
Con	ISO 1d	ISO 3d	ISO 7d
31	56	35	35
37	65	32	36
31	67	36	34
32	64	34	35
34	61	33	36

## Sheet: LVEF
Con	ISO 1d	ISO 3d	ISO 7d
77.9388	45.7268	57.2299	67.7779
76.3633	44.562	66.9468	68.4692
75.3925	45.8489	70.3748	66.007
72.6519	49.86	61.2703	67.1857
75.3925	55.8489	70.3748	76.007

## Sheet: LVEDV
Con	ISO 1d	ISO 3d	ISO 7d
342.383	195.727	357.23	337.778
319.117	224.562	306.947	338.469
317.986	195.849	317.375	316.007
334.837	200.86	326	347.186
324.837	192.849	327.375	306.007

## Sheet: LVESV
Con	ISO 1d	ISO 3d	ISO 7d
75.5337	106.227	152.788	108.839
75.4287	124.493	101.456	106.722
78.2486	106.054	94.023	107.42
91.5718	100.711	126.259	113.927
79.9345	85.1449	96.9855	73.4204

## Sheet: PCR
	Con	Con-GAPDH	ΔCon	ΔΔCon	Con		ISO	ISO-GAPDH	ΔISO	ΔδISO	ISO
	23.39	20.21	3.14667	-0.006667	1.00463		19.95	20.14	-0.17667	-3.33001	10.0562
	23.36	20.22	3.11667	-0.036667	1.02574		19.8	20.06	-0.32667	-3.48001	11.158
	23.44	20.3	3.19667	0.043333	0.97041		19.66	20.18	-0.46667	-3.62001	12.2951
Mrpl3		20.2433	3.15334		1.00026			20.1267			11.1697
	Con	Con-GAPDH	ΔCon	ΔΔCon	Con		ISO	ISO-GAPDH	ΔISO	ΔδISO	ISO
	28.02	20.21	7.77667	-0.053333	1.03766		24.95	20.14	4.82333	-3.00667	8.03709
	28.12	20.22	7.87667	0.046667	0.96817		24.8	20.06	4.67333	-3.15667	8.91771
	28.08	20.3	7.83667	0.006667	0.995389		24.66	20.18	4.53333	-3.29667	9.82647
Gfpt2		20.2433	7.83		1.00041			20.1267			8.92709
	Con	Con-GAPDH	ΔCon	ΔΔCon	Con		ISO	ISO-GAPDH	ΔISO	ΔδISO	ISO
	26.24	20.21	5.99667	-0.043333	1.03049		23.14	20.14	3.01333	-3.02667	8.14928
	26.31	20.22	6.06667	0.026667	0.981686		23.19	20.06	3.06333	-2.97667	7.87169
	26.3	20.3	6.05667	0.016667	0.988514		23.06	20.18	2.93333	-3.10667	8.61394
Fads1		20.2433	6.04		1.00023			20.1267			8.21164
	Con	Con-GAPDH	ΔCon	ΔΔCon	Con		ISO	ISO-GAPDH	ΔISO	ΔδISO	ISO
	26.6	19.76	6.77667	0.07	0.952638		22.47	19.5	2.97	-3.73667	13.3306
	26.56	19.85	6.73667	0.03	0.97942		22.79	19.46	3.29	-3.41667	10.6787
	26.43	19.86	6.60667	-0.1	1.07177		22.83	19.54	3.33	-3.37667	10.3867
Loxl2		19.8233	6.70667		1.00128			19.5			11.4654
	Con	Con-GAPDH	ΔCon	ΔΔCon	Con		ISO	ISO-GAPDH	ΔISO	ΔδISO	ISO
	28.36	19.76	8.53667	0.016667	0.988514		24.95	19.5	5.45	-3.07	8.39775
	28.29	19.85	8.46667	-0.053333	1.03766		24.71	19.46	5.21	-3.31	9.91768
	28.38	19.86	8.55667	0.036667	0.974905		24.8	19.54	5.3	-3.22	9.31789
Ntrk2		19.8233	8.52		1.00036			19.5			9.21111
	Con	Con-GAPDH	ΔCon	ΔΔCon	Con		ISO	ISO-GAPDH	ΔISO	ΔδISO	ISO
	29.83	19.76	10.0067	-0.02667	1.01866		31.69	19.5	12.19	2.15666	0.224275
	29.93	19.85	10.1067	0.07333	0.950442		32.99	19.46	13.49	3.45666	0.0910839
	29.81	19.86	9.98667	-0.04667	1.03288		30.92	19.54	11.42	1.38666	0.382449
Cyp1a1		19.8233	10.0333		1.00066			19.5			0.232603
	Con	Con-GAPDH	ΔCon	ΔΔCon	Con		ISO	ISO-GAPDH	ΔISO	ΔδISO	ISO
	22.39	19.41	2.95667	0.103333	0.93088		23.74	19.31	4.46333	1.60999	0.3276
	22.14	19.33	2.70667	-0.146667	1.10701		24.52	19.04	5.24333	2.38999	0.190783
	22.33	19.56	2.89667	0.043333	0.97041		24.6	19.48	5.32333	2.46999	0.180492
Cd1d1		19.4333	2.85334		1.00277			19.2767			0.232958
	Con	Con-GAPDH	ΔCon	ΔΔCon	Con		ISO	ISO-GAPDH	ΔISO	ΔδISO	ISO
	21.39	19.41	1.95667	-0.896667	1.86176		23.64	19.31	4.36333	1.84333	0.278678
	22.14	19.33	2.70667	-0.146667	1.10701		24.22	19.04	4.94333	2.42333	0.186426
	22.33	19.56	2.89667	0.043333	0.97041		24.16	19.48	4.88333	2.36333	0.194342
Znf22		19.4333	2.52		1.31306			19.2767			0.219816
	Con	Con-GAPDH	ΔCon	ΔΔCon	Con		ISO	ISO-GAPDH	ΔISO	ΔδISO	ISO
	26.95	19.41	7.51667	-0.126667	1.09177		28.64	19.31	9.20667	1.56333	0.338368
	27.09	19.33	7.65667	0.013333	0.990801		29.02	19.04	9.58667	1.94333	0.260015
	27.19	19.56	7.75667	0.113333	0.92445		28.88	19.48	9.44667	1.80333	0.286512
Mup3		19.4333	7.64334		1.00234			19.2767			0.294965
	Con	Con-GAPDH	ΔCon	ΔΔCon	Con		ISO	ISO-GAPDH	ΔISO	ΔδISO	ISO
	26.25	19.41	6.81667	-0.826667	1.77358		28.64	19.31	9.20667	1.79667	0.287839
	27.12	19.33	7.68667	0.043333	0.97041		28.92	19.04	9.48667	2.07667	0.237061
	27.16	19.56	7.72667	0.083333	0.943875		28.28	19.48	8.84667	1.43667	0.36942
Lsm1		19.4333	7.41		1.22929			19.2767			0.298107
